# Supplementary material for: Establishing cost-effectiveness threshold in China: a community survey of willingness to pay for a healthy life year
Source: PubMed Central journal article supplement — BMJ Glob Health. 2024 Jan 9;9(1):e013070. doi: 10.1136/bmjgh-2023-013070 (PMC10806867; doi:10.1136/bmjgh-2023-013070), 2024-01-09
Supplement: bmjgh-2023-013070supp001.pdf [file bmjgh-2023-013070supp001.pdf]

## Cost effectiveness threshold in China Questionnaire

### Willingness to Pay

#### Scenario A

Imagine that you have a common non-communicable chronic disease. Now, please assume that Treatment A is able to extend your life by one full year. You will be completely healthy in this extended year without any pains. However, the Treatment A is not covered by your public health insurance scheme and you do not have any private health insurance to pay for this treatment. **All** expenses will be covered out-of-pocket.

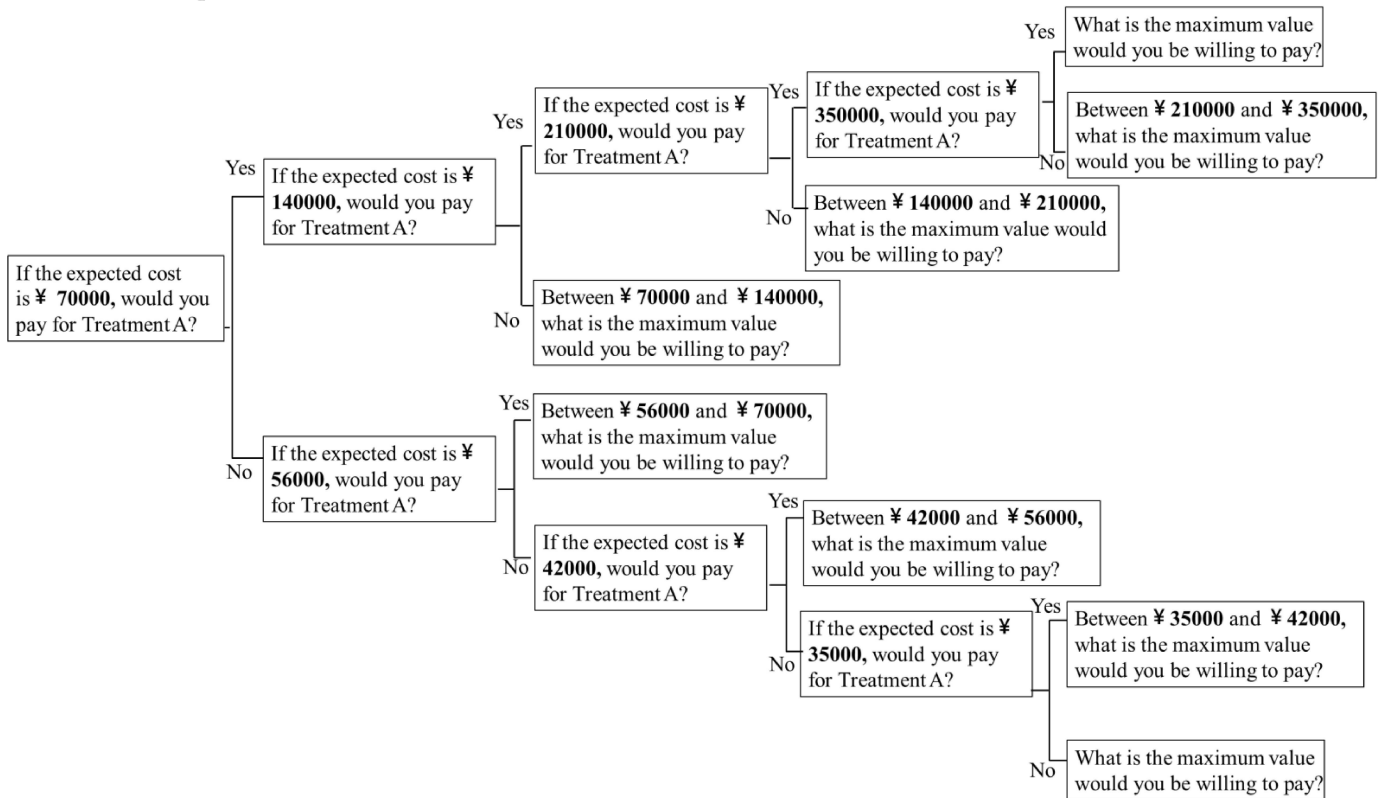

### Scenario B

Imagine that you have a rare disease that immediately threatens your life. Now, please assume that Treatment B is able to extend your life by one full year. You will be completely healthy in this extended year without any pains. However, the Treatment B is not covered by your public health insurance scheme and you do not have any private health insurance to pay for this treatment. **All** expenses will be covered out-of-pocket.

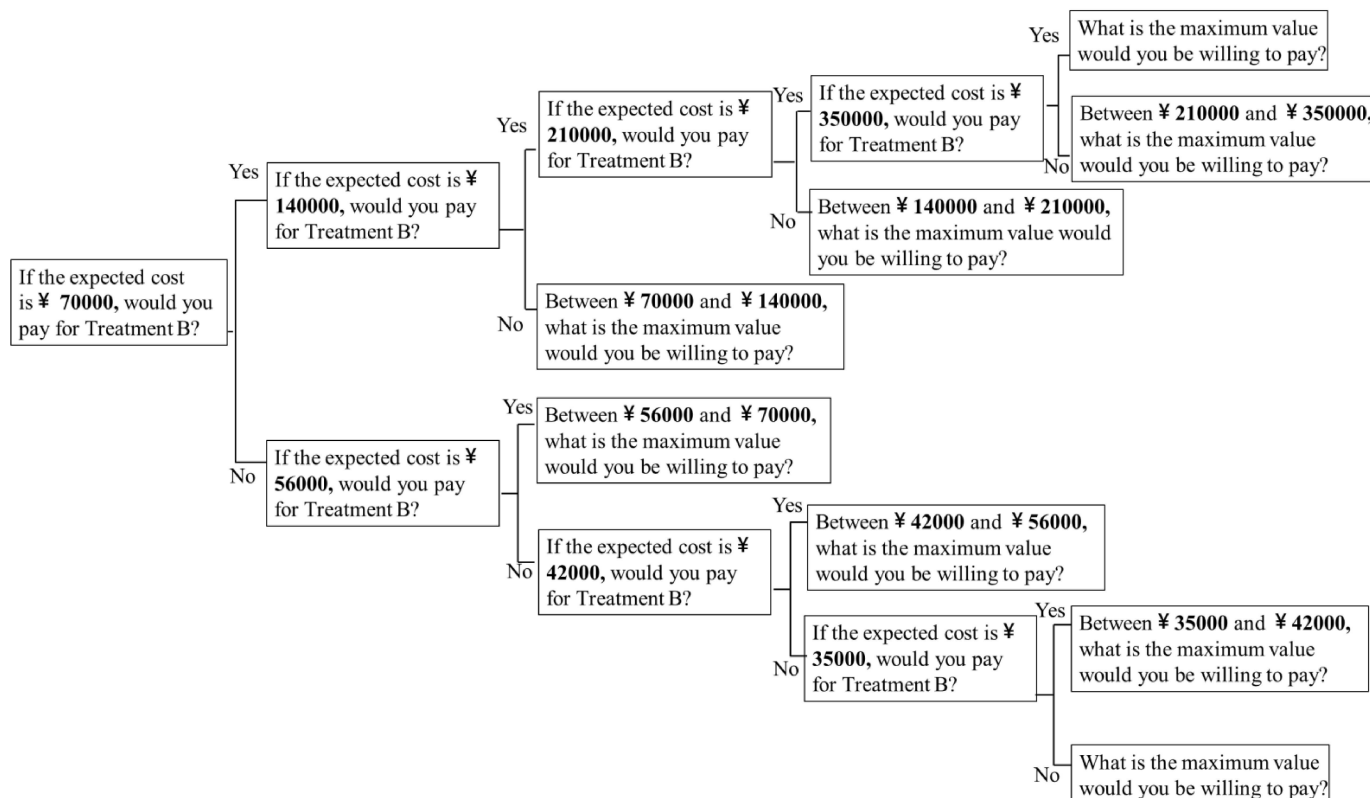

### Scenario C

Imagine that you have a serious fatal disease that immediately threatens your life. Now, please assume that Treatment C is able to extend your life by one full year. You will be completely healthy in this extended year without any pains. However, the Treatment C is not covered by your public health insurance scheme and you do not have any private health insurance to pay for this treatment. **All** expenses will be covered out-of-pocket.

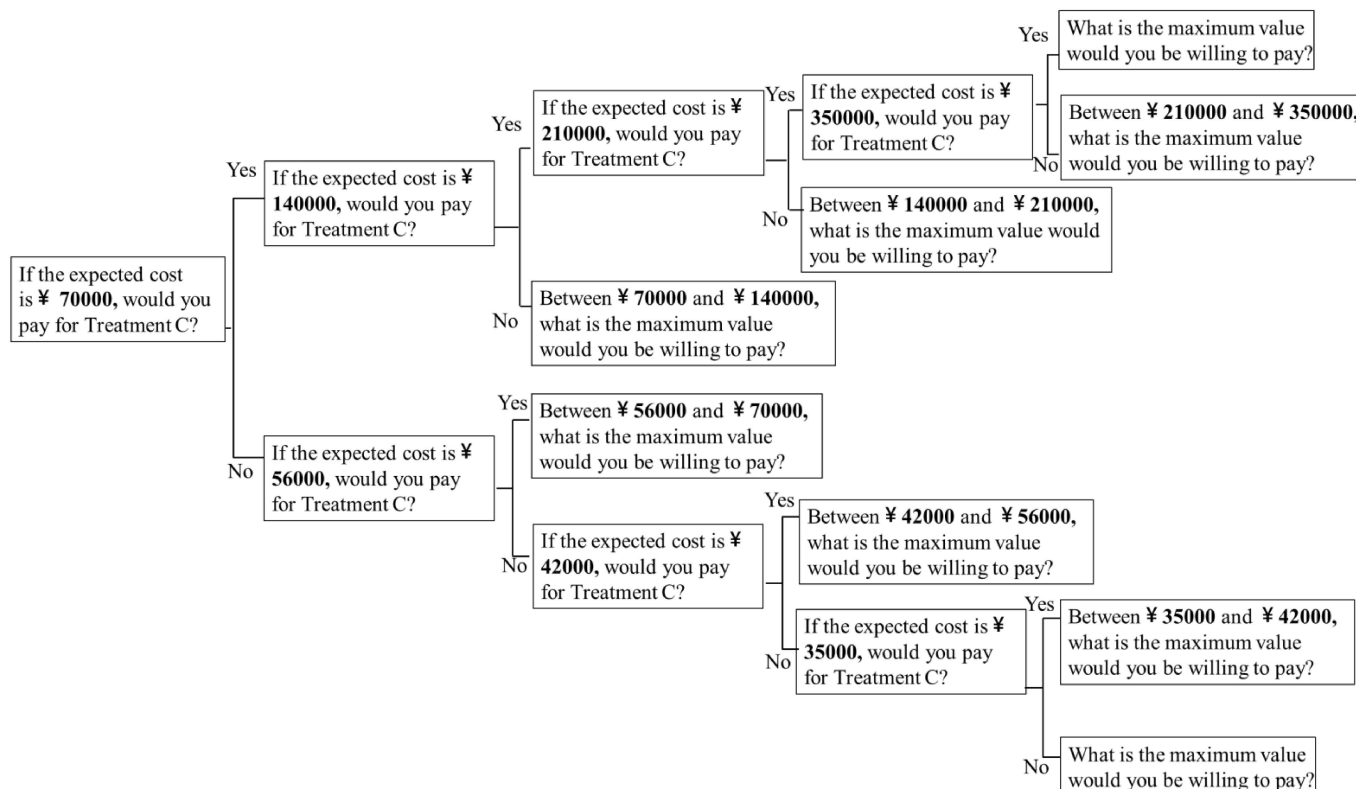

## Socioeconomic information

1. Your sex is

- (1) Male
- (2) Female

2. Your year and month of birth is

Year \_\_\_\_\_ Month \_\_\_\_\_

3. Your marital status is

- (1) Married
- (2) Unmarried
- (3) Divorced
- (4) Widowed
- (5) Other

4. Your highest educational level is

- (1) Primary school and below
- (2) Middle school
- (3) High school
- (4) University and above
- (5) Employment Status

5. What is your employment status?

- (1) Employed
- (2) Retired
- (3) Unemployed

6. What is your location of residence?

- (1) Urban
- (2) Urban-rural areas
- (3) Rural

7. How many family members do you have (including yourself)?

\_\_\_\_\_ members

8. Your household consumption expenditure in 2020 is

RMB \_\_\_\_\_ Yuan

9. Which category of social health insurance do you have?

- (1) Urban Employee Basic Medical Insurance
- (2) Urban–Rural Residents Basic Medical Insurance
- (3) None

10. Do you have any commercial medical insurance

- (1) Yes
- (2) No

11. Do you have any kind of the following chronic diseases?

- (1) Hypertension

- (2) Dyslipidemia
- (3) Diabetes
- (4) Cancer or malignant tumor
- (5) Chronic lung diseases, such as chronic bronchitis, emphysema
- (6) Liver disease
- (7) heart problems
- (8) Stroke
- (9) Kidney disease
- (10) Stomach or other digestive diseases
- (11) Memory-related disease
- (12) Osteoporosis or fracture
- (13) Arthritis or rheumatism
- (14) Asthma
- (15) Others
- (16) None

### **Quality of Life (EQ-5D-5L)**

Under each heading, please tick the ONE box that best describes your health TODAY.

#### **MOBILITY**

- I have no problems in walking about
- I have slight problems in walking about
- I have moderate problems in walking about
- I have severe problems in walking about
- I am unable to walk about

#### **SELF-CARE**

- I have no problems washing or dressing myself
- I have slight problems washing or dressing myself
- I have moderate problems washing or dressing myself
- I have severe problems washing or dressing myself
- I am unable to wash or dress myself

#### **USUAL ACTIVITIES (e.g. work, study, housework, family or leisure activities)**

- I have no problems doing my usual activities
- I have slight problems doing my usual activities
- I have moderate problems doing my usual activities
- I have severe problems doing my usual activities
- I am unable to do my usual activities

#### **PAIN / DISCOMFORT**

- I have no pain or discomfort
- I have slight pain or discomfort
- I have moderate pain or discomfort
- I have severe pain or discomfort
- I have extreme pain or discomfort

ANXIETY / DEPRESSION

I am not anxious or depressed

I am slightly anxious or depressed

I am moderately anxious or depressed

I am severely anxious or depressed

I am extremely anxious or depressed
